# Supplementary material
Source: Springer Nature journal article supplement (https://www.springermedizin.de/resource/supplementary/12871_2014_330_MOESM1_ESM.pdf/9429134)
Supplement: MOESM1 [file 9429134]

standard care and intervention

monitor MAP, CVP, keep Hb > 5 mmol/L

MAP < 65 mmHg

MAP ≥ 65 mmHg

monitor CVP

CVP < 8 mmHg

CVP ≥ 8 mmHg

500 ml colloid

monitor MAP

MAP < 65 mmHg

norepinephrine 0.03 μg/kg/min, increase if needed

intervention

monitor StO<sub>2</sub>

StO<sub>2</sub> < 80%

StO<sub>2</sub> ≥ 80%

dobutamine 2.5 μg/kg/min, increase if needed
